# Supplementary material for: Behavioral responses for facemask use messages to prevent COVID-19 among residents of Bahir Dar City, Ethiopia: an application of extended parallel process model
Source: Springer Nature journal article supplement (doi:10.1186/s12889-022-14872-5), 2022-12-22
Supplement: MOESM1 [file 23852930]

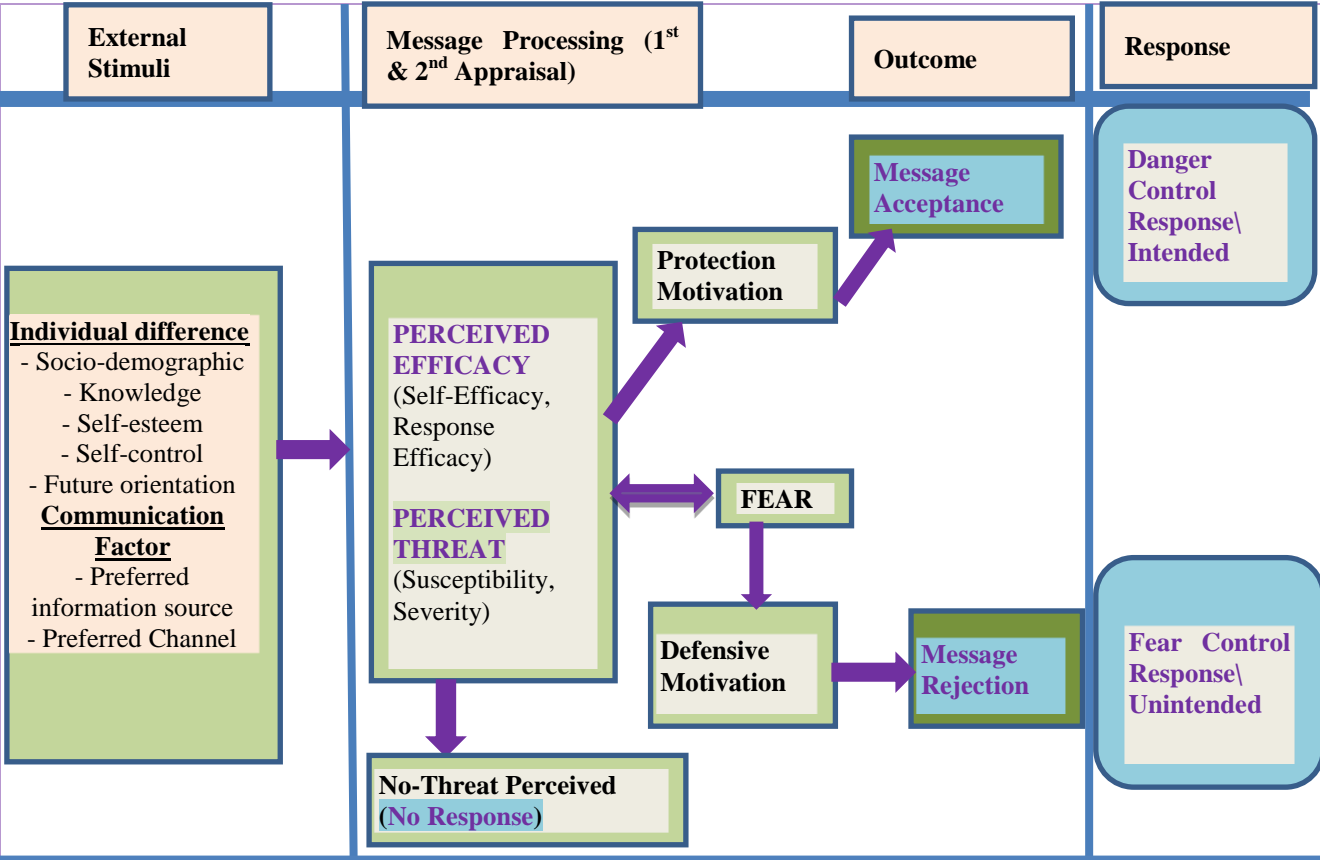

(Adapted from: Kim Witte (2001), Effective Health risk messages a step-by-step guide
