# Supplementary material for: Behavioral responses for facemask use messages to prevent COVID-19 among residents of Bahir Dar City, Ethiopia: an application of extended parallel process model
Source: Springer Nature journal article supplement (doi:10.1186/s12889-022-14872-5), 2022-12-22
Supplement: MOESM2 [file 23852930]

**Bahir Dar University College of Medicine and Health Science School of Public Health**  
**Department of health promotion and behavioral Sciences**

CONSENT FORM AND INFORMATION SHEET

Hello! Dear sir / madam,

Bahir Dar University, Department of health promotion and behavioral sciences conducting a research on “Behavioral responses for the facemask use messages to prevent COVID-19 among residents of Bahir Dar city, Amhara, Ethiopia”. Permission was obtained from the research and ethical committee of Bahir Dar University and Bahir Dar city administration to conduct this study.

The objective of this study is to assess behavioral responses for the facemask use messages to prevent COVID-19 among residents of Bahir Dar city. The main part of the study involves collecting information from 634 respondents like you. You are selected randomly. We are kindly requesting you to answer the questions that we have prepared for you. The interview will be held in Amharic for about 15-20 minutes. One person will be asked once at a time.

We assure all information gathered during the course of the study will be kept completely secure (confidential). All the information that you are going to deliver to us will be coded for anonymity. You have the right to raise questions at any time for clear understanding.

There is no incentive or payment for participating in this research. Participation is voluntary; you do not have to answer any questions that you do not want to answer. You may end to participate in the study at any time you want without giving a reason and without fear. No force or harm will be occurred. However, your honest answers to these questions will help us to better understand people's perceptions about COVID-19 and behavioral responses to the facemask use messages for better decision-making and interventions.

- |    |                                      |        |       |
|----|--------------------------------------|--------|-------|
| 1. | Would you be willing to participate? | 1. Yes | 2. No |
| 2. | Interviewer name                     | Date   |       |

\_\_\_\_\_

If you have questions about the research, contact Tenagnework Eseyneh (Email Adress: [tenagneworkel@gmail.com](mailto:tenagneworkel@gmail.com), Mobile phone no- = +251-949173682)

# QUESTIONNAIRE

## PART 1: Socio demographic Data

| CODE | VARIABLE                                                                                    | ANSWER                                                                                                   |
|------|---------------------------------------------------------------------------------------------|----------------------------------------------------------------------------------------------------------|
| 101  | Sex                                                                                         | Female<br>Male                                                                                           |
| 102  | Age                                                                                         | _____                                                                                                    |
| 103  | Educational Status                                                                          | Can't write and read<br>write and read<br>Elementary<br>High school and preparatory<br>College and above |
| 104  | Marital Status                                                                              | Married<br>Single<br>Divorced<br>Husband   wife died                                                     |
| 105  | Occupational Status                                                                         | Student<br>Housewife<br>Government<br>Merchant<br>Private  NGOs<br>Others specify...                     |
| 106  | Average monthly income (in ETB)                                                             | _____                                                                                                    |
| 107  | Do you have Chronic disease?(Hypertension, Diabetes Mellitus, Heart Failure, Asthmatic ...) | Yes<br>No                                                                                                |
| 108  | How many people live With you?                                                              | _____                                                                                                    |

## Part 2 Communication Factor

The following statements are about your source of information and preference of COVID-19 message, source, and channel Please give your answer according to the statements (Yes or No).

| CODE | Variable                           |  | Yes | No |
|------|------------------------------------|--|-----|----|
| 201  | Have you heard about Corona Virus? |  |     |    |

|     |                                                                            |                                                |  |  |
|-----|----------------------------------------------------------------------------|------------------------------------------------|--|--|
| 202 | Preferred sources of Information<br><br>(more than one answer is possible) | Health institution                             |  |  |
|     |                                                                            | Media                                          |  |  |
|     |                                                                            | Religious institutions                         |  |  |
|     |                                                                            | Friends                                        |  |  |
|     |                                                                            | Family                                         |  |  |
|     |                                                                            | Spouse                                         |  |  |
|     |                                                                            | Other specify...                               |  |  |
| 203 | Preferred channels<br><br>(more than one answer is possible)               | Television                                     |  |  |
|     |                                                                            | Radio                                          |  |  |
|     |                                                                            | Peer discussion                                |  |  |
|     |                                                                            | Printed materials(leaflets,<br>posters, poems) |  |  |
|     |                                                                            | Others specify...                              |  |  |

PART 3 Miscellanies scales: Knowledge, Self-esteem, Self-control, and Future orientations

The following are statements about individual characteristics, Please give your answer according to your agreement to the statements according to the scale.

Just please give your honest opinion.

| CODE | Knowledge related to COVID-19                       | Yes | No | I don't know |
|------|-----------------------------------------------------|-----|----|--------------|
| 301  | Is Coronavirus disease caused by a newly discovered |     |    |              |

|     |                                                                                                                                           |                       |  |  |  |
|-----|-------------------------------------------------------------------------------------------------------------------------------------------|-----------------------|--|--|--|
|     | coronavirus?                                                                                                                              |                       |  |  |  |
| 302 | Which one is the main clinical symptom of COVID-19?                                                                                       | Fever                 |  |  |  |
|     |                                                                                                                                           | Fatigue               |  |  |  |
|     |                                                                                                                                           | Continuous dry cough  |  |  |  |
|     |                                                                                                                                           | shortness of breath   |  |  |  |
| 303 | Is COVID-19 a transmissible disease/contagious?                                                                                           |                       |  |  |  |
| 304 | Does the COVID-19 virus spread primarily through droplets of saliva or discharge from the nose when an infected person coughs or sneezes? |                       |  |  |  |
| 305 | Are Elderly people or people with chronic health conditions developing severe conditions if infected with COVID-19?                       |                       |  |  |  |
| 306 | Do People infected with the COVID-19 virus without any symptoms will not infect others?                                                   |                       |  |  |  |
| 307 | Currently, Is there an effective drug to cure COVID-19?                                                                                   |                       |  |  |  |
| 308 | Does early diagnosis of COVID-19 improve the treatment?                                                                                   |                       |  |  |  |
| 309 | Is COVID-19 being a preventable disease?                                                                                                  |                       |  |  |  |
| 310 | Which one can reduce the risk of COVID-19 infection?                                                                                      | Using facemask        |  |  |  |
|     |                                                                                                                                           | Handwashing with soap |  |  |  |
|     |                                                                                                                                           | physical distancing   |  |  |  |

1= Strongly Disagree, 2= Disagree, 3= Neutral, 4= Agree, 5= Strongly Agree

| CODE | Items | 1 | 2 | 3 | 4 | 5 |
|------|-------|---|---|---|---|---|
|------|-------|---|---|---|---|---|

|     |                                                    |  |  |  |  |  |
|-----|----------------------------------------------------|--|--|--|--|--|
|     | Self-Esteem                                        |  |  |  |  |  |
| 311 | You believe you have satisfied with yourself.      |  |  |  |  |  |
| 312 | You think you have good qualities.                 |  |  |  |  |  |
| 313 | Sometimes you think you are not good at all.       |  |  |  |  |  |
| 314 | You wish I were someone else.                      |  |  |  |  |  |
|     | Self-control                                       |  |  |  |  |  |
| 315 | You think carefully about all your choices.        |  |  |  |  |  |
| 316 | You will do what you think good for the moment.    |  |  |  |  |  |
| 317 | Sometimes you like breaking rules.                 |  |  |  |  |  |
| 318 | You do it quietly without thinking.                |  |  |  |  |  |
|     | Future orientation                                 |  |  |  |  |  |
| 319 | You will enjoy today because you may die tomorrow. |  |  |  |  |  |
| 320 | You try not to think about your future.            |  |  |  |  |  |
| 321 | You try to save money for other days.              |  |  |  |  |  |

**PART 4 Perceptions about COVID-19**

The following statements are about your perception of COVID-19 and the prevention method.

Please give your answer according to your agreement to the statements according to the scale.

1= Strongly Disagree, 2= Disagree, 3= Neutral, 4= Agree, 5= Strongly Agree

| CODE | ITEM             | 1 | 2 | 3 | 4 | 5 |
|------|------------------|---|---|---|---|---|
|      | PERCEIVED THREAT |   |   |   |   |   |

|                    |                                                                   |   |   |   |   |   |
|--------------------|-------------------------------------------------------------------|---|---|---|---|---|
|                    | Perceived Severity                                                |   |   |   |   |   |
| 401                | I believe that Corona Virus disease has no cure.                  |   |   |   |   |   |
| 402                | I believe that Corona Virus disease does not cause death.         |   |   |   |   |   |
| 403                | I believe that Corona is a life-threatening disease.              |   |   |   |   |   |
|                    | Perceived Susceptibility                                          | 1 | 2 | 3 | 4 | 5 |
| 404                | I am at risk of getting Corona Virus.                             |   |   |   |   |   |
| 405                | I believe that I will not get infected with Corona Virus disease. |   |   |   |   |   |
| 406                | It is possible that I will have Corona Virus.                     |   |   |   |   |   |
| PERCEIVED EFFICACY |                                                                   |   |   |   |   |   |
|                    | Self-Efficacy                                                     | 1 | 2 | 3 | 4 | 5 |
| 407                | I can use a facemask to prevent getting Corona Virus.             |   |   |   |   |   |
| 408                | Facemask is not easy to use to prevent Corona Virus.              |   |   |   |   |   |
| 409                | Using facemasks to prevent Corona Virus is convenient.            |   |   |   |   |   |
|                    | Response Efficacy                                                 | 1 | 2 | 3 | 4 | 5 |
| 210                | Facemask works in preventing Corona Virus.                        |   |   |   |   |   |
| 211                | Using a facemask is not effective in preventing Corona Virus.     |   |   |   |   |   |
| 212                | If I use a facemask, I am less likely to get Corona Virus.        |   |   |   |   |   |
